# Supplementary material
Source: publisher figshare collection journal article supplement (https://sage.figshare.com/ndownloader/files/23553635)
Supplement: Supplementary file 1 [file 23553635]

**APPENDIX: FIDELITY SAMPLE**

| Session Date: ___/___/___ Rater:____________ Cohort: _________  ***Reviewed by study staff* - Session 9: MOVE!+UP Fidelity Assessment** |
| --- |

| **Scoring - 0: Did not cover** = this topic or focus point did not happen at all  **1: Partially covered** = this happened to some extent  **2: Fully covered** = the goal was met fully for all participants  **N/A:** Not applicable |
| --- |
|  |
| **A. Weigh-in, Arrival, and Copying of logs (10 min)**   1. ____ Reminded group members about recording of sessions. 2. ____ Copied logs, remaining page 4s, and pg 46. 3. ____ Completed weight log, and asked them to record weight in AP #1. 4. ____ Provided logs, and other materials. 5. ____ Wrote key check-in questions on board. 6. ____ Provided any additional support needed in remaining time. 7. **[____MIN]** Record number of minutes spent in this section.   **B. Check-In (13 min)**   1. ____ Asked Veterans to answer key check-in questions. Read the questions. 2. ____ Summarized takeaways. 3. **[____MIN]** Record number of minutes spent in this section.   **C. Session Content (34 min)**   1. ____ Reviewed session 8 content, including review of sugar handout 2. ____ Introduced session content overview, including review of key messages (pg 111). 3. ____ Discuss community engagement, explain how community walk is an example. 4. ____ Asked ppts to complete writing exercise on pg 112. 5. ____ Discussed community engagement, why important, barriers and successes when pursuing lifestyle changes, and how to increase engagement. 6. ____ Asked ppts to review community engagement tips handout on pg 113. Asked some to share. 7. ____ Discussed dining out. Asked ppts to review dining out tips handout on pg 114. Asked one volunteer to share. 8. ____ Reviewed pg 115 and thought challenging strategy. Asked who has been using it and how. 9. ____ Draw thought > behavior > emotion boxes on board. Asked for one volunteer to share an example of a goal they did not accomplish. 10. ____ Using the thought challenging exercise, demonstrate thought challenging process on board. Summarize takeaways and encourage practice. 11. ____ Reviewed pg 116 and problem-solving strategies. Asked for one volunteer to share an example of a problem they faced. Demonstrate problem-solving process on board. Summarize takeaways and encourage practice. 12. **[____MIN]** Record number of minutes spent in this section.   **D. Community Walk Review (3 min)**   1. ____ Asked to use problem-solving and thought challenging to discuss barriers to weight loss and activity/diet goals. 2. ____ Reminded them about core details of the walking portion of the sessions including reviewing Community Walk, Map of Jefferson Park handouts AS NEEDED. 3. ____ Reminded to meet back in the room following walk at 9:35 to start at 9:40. 4. **[____ MIN]** Record number of minutes spent in this section.   **E. Community Walk (40 min)**  a. **______ left room at 9/met at coffee cart 9:05; returned to room by 9:37 at latest to begin at 9:40**  **F.**  **Walk Review and Action Plan Assignment (20 min)**   1. ____ Asked how it went with thought challenging and problem-solving, and checked-in on how feel. 2. ____Reviewed instructions for Action Plan and reminded ppts to use pgs 34, 44 and 46. 3. ____ Asked to complete in-class Action Plan items 2-4 using thought challenging and problem-solving. 4. ____ Walked around room and provided feedback for ppts while they completed exercises. 5. ____ Provided feedback for examples given by one volunteer on goals and behavioral strategy. 6. ____ Asked for volunteer to share a goal and provided feedback. Asked who has needs in #4. 7. ____ Reminded ppts about looking up info on pgs 192-194, to do after action report, and logging. 8. ____ Briefly reviewed key messages from group, summarized takeaways, and answered final questions. 9. **[____ MIN]** Record number of minutes spent in this section.   **G. Managing the Session**   1. ____ Came prepared and organized. 2. ____ Facilitated discussion and interaction using open-ended questions. 3. ____ Used reflections and summaries. 4. ____ Elicited clarification of participants’ engagement by seeking feedback, asking for questions. 5. ____ Addressed issues like tangential discussions respectfully, without disrupting content. 6. ____ Provided time frames at the beginning of each section to help with time management. |
| **Comments Regarding Reasons for Non-Fidelity in A-G (record specific time stamp location if example of something facilitator(s) did that could be improved upon):**  **Comments Regarding Things Done Well in A-G (record specific time stamp location if there’s a specific example of something done well):**  **Comments Regarding Suggestions for Changes to Procedures, Materials, and/or Manual:**  **Describe adverse events those that occurred; include those that occurred during the session, and those that were reported by participants outside of session.** |
